# Supplementary material for: Fe3O4/chitosan nanocomposite for magnetic drug targeting to cancer
Source: Royal Society of Chemistry journal article supplement (doi:10.1039/c2jm15339d), 2012-01-01
Supplement: c2jm15339d.pdf [file c2jm15339d.pdf]

## **Fe<sub>3</sub>O<sub>4</sub>/Chitosan Nanocomposite for Magnetic Drug Targeting to Cancer**

*José L. Arias, L. Harivardhan Reddy, Patrick Couvreur*

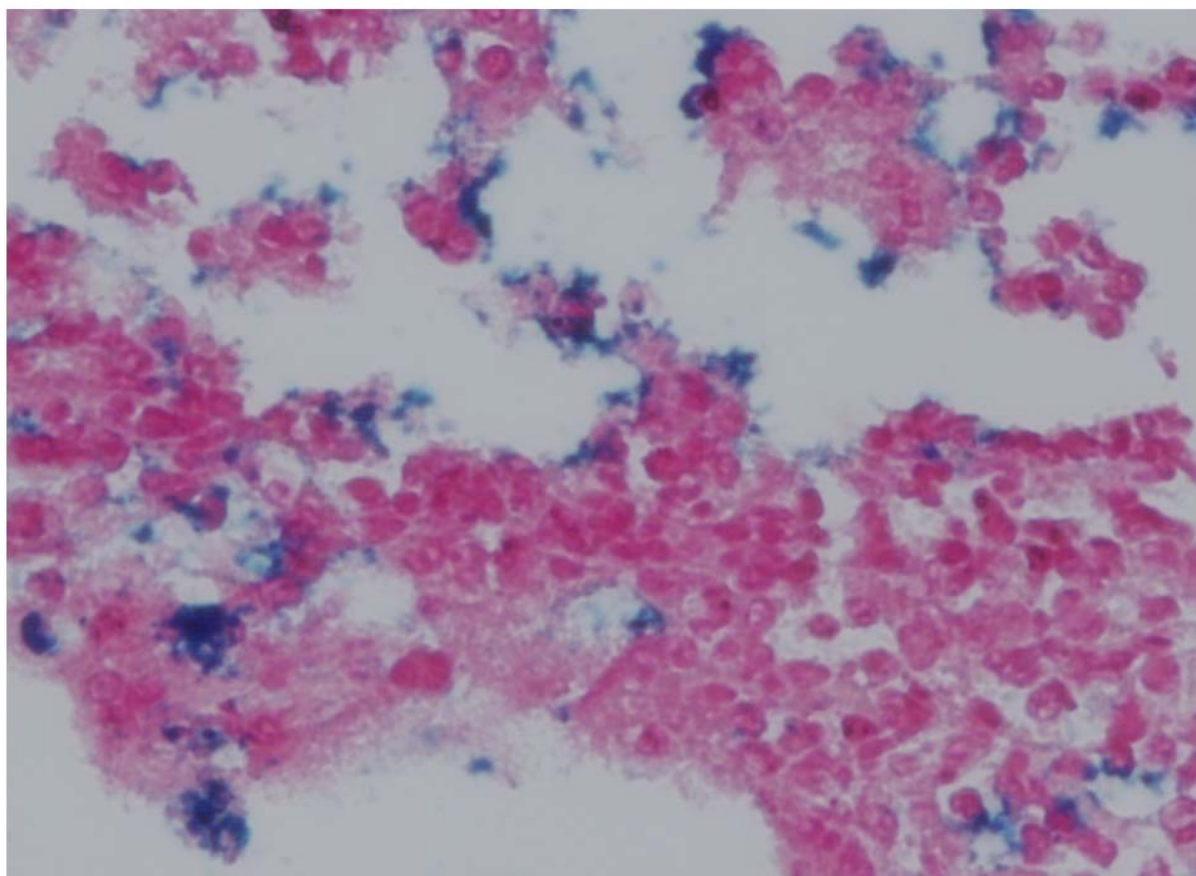

**Supplementary Fig. 1** Microscope photograph, magnification 20X, of the Prussian blue staining test of tumors obtained from mice treated with Fe<sub>3</sub>O<sub>4</sub>/chitosan nanocomposites with an extracorporeal magnetic gradient (1.1 T for 2 h after injection) (5 mg/Kg equivalent of gemcitabine).
